# Supplementary material for: Additive Effects of Lithium Salts with Various Anionic Species in Poly (Methyl Methacrylate)
Source: MDPI journal article supplement (doi:10.3390/molecules26134096), 2021-07-05
Supplement: s1 [file s1]

---

## Supporting Information

### **Additive effects of lithium salts with various anionic species in poly(methyl methacrylate)**

Asae Ito and Koh-hei Nitta\*

Polymer physics laboratory, Institute of Science and Engineering, Kanazawa University, Kakuma Campus, Kanazawa, Ishikawa, 920-1192, JAPAN

## 1. Characterization of the PMMA/salt samples

Figure S1 shows the UV-vis spectra of the PMMA/salt samples, where the transmittance values of the samples with 7 mol% of the salt concentrations were above 80%, except for PMMA/LiBr (Figure S1). PMMA/LiBr (1 mol%) yielded a yellow-colored film, and the transmittance dropped below 50 %. Figure S2 shows the ATR spectra in the range of the stretching vibration mode of carbonyl groups, for wavenumbers in the 1650–1780  $\text{cm}^{-1}$  range.

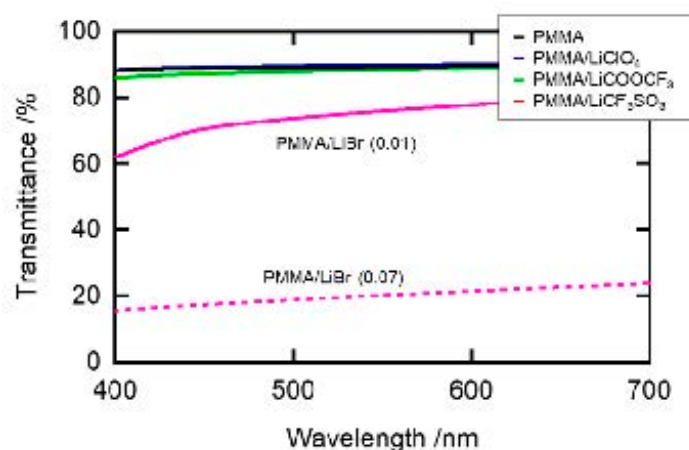

Figure S1 UV-Vis spectra of PMMA/salt samples with  $[\text{Li}]/[\text{C}=\text{O}] = 0.07$  and PMMA/LiBr with  $[\text{Li}]/[\text{C}=\text{O}] = 0.01$ . PMMA/LiBr with 1 mol% of the salt concentration showed low transmittance below 30%.

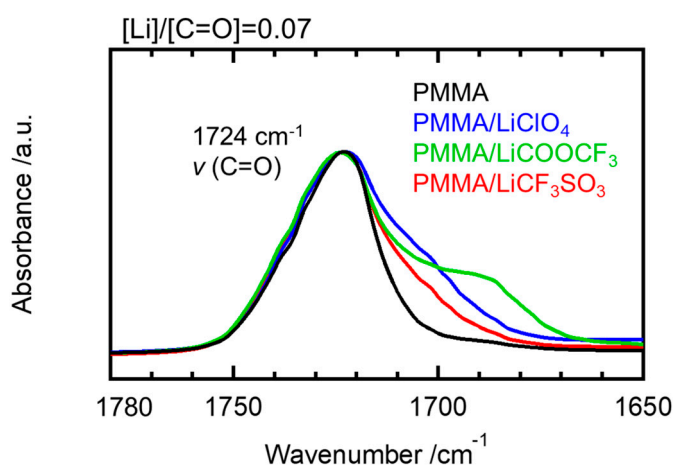

Figure S2 ATR spectra of PMMA/salt samples in the range of the stretching vibration mode of carbonyl groups with  $[\text{Li}]/[\text{C}=\text{O}] = 0.07$ .

## 2. Solubility parameter of salt species

We plotted the values of  $T_g$  against the cohesive energy of salts estimated using the atomic group contribution method, to validate the results in Figure 4. The cohesive force between the salts increased with  $T_g$  of the PMMA matrix, as shown in Figure S3.

Thus, we calculated the solubility parameters by estimating the cohesive energy of the salts using the atomic cluster contribution method and plotted the results against  $T_g$ . The molar gravitational constants for each functional group[1] of each salt used in this calculation are listed in Table S1.

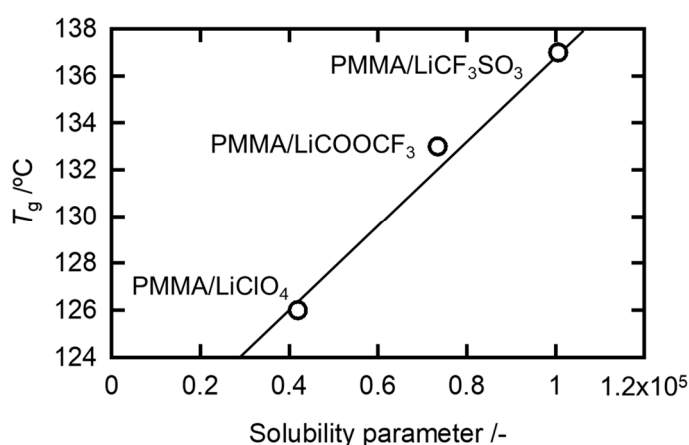

Figure S3 Relationship between the  $T_g$  of the PMMA/salt samples and cohesive energies of salts, for  $[\text{Li}]/[\text{C}=\text{O}] = 0.07$ .

Table S1 Functional groups and molar attraction constants of the salts.

| Functional group | Molar Attraction Constant<br>( $\text{MPa}^{1/2} \cdot \text{cm}^3/\text{mol}$ ) |
|------------------|----------------------------------------------------------------------------------|
| -COO             | 569                                                                              |
| -CF <sub>3</sub> | 496                                                                              |
| SO <sub>3</sub>  | 721                                                                              |
| -Cl              | 526                                                                              |
| -O-              | 100                                                                              |

### 3. A coupled vibration mode model for IR spectra

We considered a bead-spring model assuming a coupling interaction between the vibration of carbonyl groups and Li cations (Figure S4). We restricted the motion to the line connecting the masses, so the system corresponds to the stretching vibration modes of IR spectra and has only three degrees of freedom, represented by the coordinates  $x_1$ ,  $x_2$ , and  $x_3$ . Each coordinate was measured from the equilibrium position. As a result, the determinant of the following matrix provided a nontrivial solution for the system of simultaneous motion equations:

$$\begin{vmatrix} \lambda - \omega_{11}^2 & \omega_{11}^2 & 0 \\ \omega_{12}^2 & \lambda - (\omega_{11}^2 + \omega_{22}^2) & \omega_{22}^2 \\ 0 & \omega_{23}^2 & \lambda - \omega_{23}^2 \end{vmatrix} = 0 \quad (\text{S1})$$

Here, the angular frequency is  $\omega_{ij} = \sqrt{N_A k_i / M_j}$ , where  $N_A$  is the Avogadro number and  $M_j$  is the molecular weight of each particle.

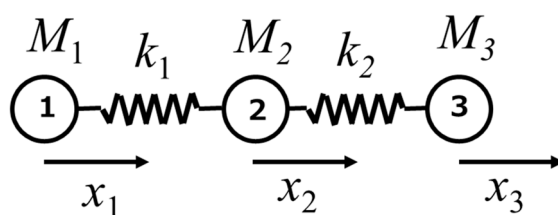

Figure S4 Three masses are connected by a Hookean spring to each other. This system describes coupled motion along one dimension.

Here, particles 1, 2, and 3 are C, O, and Li atoms, respectively. The spring constant  $k_1$  was estimated from  $1724 \text{ cm}^{-1}$ , which is the IR band of the carbonyl group, giving  $k_1 = 12 \times 10^2 \text{ N/m}$ . Assuming that the spring constant  $k_2$  is in the  $1 \times 10^2 - 10 \times 10^2 \text{ N/m}$  range, corresponding to the single to double bonds, a novel vibration mode appeared in the  $1400\text{--}1500 \text{ cm}^{-1}$  range.

In addition, we present the assignments of infrared absorption bands of PMMA[2–4].

Table S2 Wavenumbers and assignments of infrared absorption bands of PMMA[2–4].

| Wavenumbers (cm <sup>-1</sup> )<br>in this result | Wavenumbers (cm <sup>-1</sup> ) reported in reference [2–4] | Assignments [2–4]                                                                                                      |
|---------------------------------------------------|-------------------------------------------------------------|------------------------------------------------------------------------------------------------------------------------|
| 2994                                              | 2995 [2]                                                    | $\nu_a$ (C-H) of $\alpha$ -CH <sub>3</sub> , $\nu_a$ (C-H) of OCH <sub>3</sub> [2]                                     |
| 2950                                              | 2948 [2]                                                    | $\nu_s$ (C-H) of OCH <sub>3</sub> with $\nu_s$ (C-H) of $\alpha$ -CH <sub>3</sub> , and $\nu_a$ (CH <sub>2</sub> ) [2] |
| 2924                                              | 2915–2920 [2]                                               | Combination band involving OCH <sub>3</sub> and $\nu_s$ (CH <sub>2</sub> ) [2]                                         |
| 1724                                              | 1730 [2]                                                    | $\nu$ (C=O) [2]                                                                                                        |
| 1485                                              | 1483 [2]                                                    | $\delta$ (CH <sub>2</sub> ) [2]                                                                                        |
| 1448                                              | 1452, 1465 [2]                                              | $\delta_a$ (C-H) of $\alpha$ -CH <sub>3</sub> , $\delta_a$ (C-H) of O-CH <sub>3</sub> [2]                              |
| 1435                                              | 1438 [2]                                                    | $\delta$ (C-H) of OCH <sub>3</sub> [2]                                                                                 |
| 1387                                              | 1388 [2]                                                    | $\delta_s$ (C-H) of $\alpha$ -CH <sub>3</sub> [2]                                                                      |
| 1268                                              | 1270 [2]                                                    | $\nu$ (C-C-O) or $\nu_s$ (C-O) [2]                                                                                     |
| 1239                                              | 1240 [2]                                                    |                                                                                                                        |
| 1190                                              | 1190 [2,3], 1192 [4]                                        | Under discussion [2–4]; possibly $\nu$ (C-O-C) [3]                                                                     |
| 1143                                              | 1150 [3], 1148 [4]                                          | Combination of delocalized modes of various ester vibrations and CH <sub>2</sub> rocking modes [3,4]                   |
| 1064                                              | 1063 [2]                                                    | $\nu$ (C-C) [2]                                                                                                        |

## References

1. Ogawa, T. Numerical Prediction of Solubility Parameter using Molar Attraction Constant. *J. Adhes. Soc. Japan* **2017**, *53*, 129–136, doi:10.11618/adhesion.53.129.
2. Willis, H.A.; Zichy, V.J.I.; Hendra, P.J. The laser-Raman and infra-red spectra of poly(methyl methacrylate). *Polymer (Guildf)*. **1969**, *10*, 737–746, doi:10.1016/0032-3861(69)90101-3.
3. Brinkhuis, R.H.G.; Schouten, A.J. Thin-film behavior of poly(methyl methacrylates). 2. An FT-IR study of Langmuir-Blodgett films of isotactic PMMA. *Macromolecules* **1991**, *24*, 1496–1504, doi:10.1021/ma00007a010.
4. Havriliak, S.; Roman, N. The infra-red absorption characteristics of syndiotactic poly(methyl methacrylate) from 1050 cm<sup>-1</sup> to 1300 cm<sup>-1</sup>. *Polymer (Guildf)*. **1966**, *7*, 387–400, doi:10.1016/0032-3861(66)90054-1.
